# Supplementary material for: Scoping review of the hardware and software features of virtual reality exposure therapy for social anxiety disorder, agoraphobia, and specific phobia
Source: Frontiers journal article supplement (doi:10.3389/frvir.2023.952741), 2023-06-06
Supplement: Data_Sheet_2.PDF [file Data_Sheet_2.PDF]

Additional file 2 – Data charting form

| <b>Legend</b>                               |                                                                                                                                                                                                                                                                                                                                                                                                                                                                                                                                                                                                                                                                                                                                                                                                                                                                                                                                                                                    |
|---------------------------------------------|------------------------------------------------------------------------------------------------------------------------------------------------------------------------------------------------------------------------------------------------------------------------------------------------------------------------------------------------------------------------------------------------------------------------------------------------------------------------------------------------------------------------------------------------------------------------------------------------------------------------------------------------------------------------------------------------------------------------------------------------------------------------------------------------------------------------------------------------------------------------------------------------------------------------------------------------------------------------------------|
| <i>Sign:</i>                                | <i>Meaning:</i>                                                                                                                                                                                                                                                                                                                                                                                                                                                                                                                                                                                                                                                                                                                                                                                                                                                                                                                                                                    |
| N/S                                         | Not Specified. The information could not be found in the main manuscript, additional files, referenced studies published in English or through online searches.                                                                                                                                                                                                                                                                                                                                                                                                                                                                                                                                                                                                                                                                                                                                                                                                                    |
| (N/S)                                       | Unclear whether the VR setup uses the given data point                                                                                                                                                                                                                                                                                                                                                                                                                                                                                                                                                                                                                                                                                                                                                                                                                                                                                                                             |
| *                                           | The information was not available in the publication. Information found in references or through online searches.                                                                                                                                                                                                                                                                                                                                                                                                                                                                                                                                                                                                                                                                                                                                                                                                                                                                  |
|                                             |                                                                                                                                                                                                                                                                                                                                                                                                                                                                                                                                                                                                                                                                                                                                                                                                                                                                                                                                                                                    |
| <b>Explanation &amp; comments of fields</b> |                                                                                                                                                                                                                                                                                                                                                                                                                                                                                                                                                                                                                                                                                                                                                                                                                                                                                                                                                                                    |
| Ease of information availability            | <p>Scoring key:</p> <p>All relevant information in the publication = 1</p> <p>All relevant information in the publication and referenced publications/websites = 2</p> <p>All relevant information found through internet and library searches = 3</p> <p>All relevant information could not be found = 4</p> <p>‘All relevant information’ encompasses the following three points:</p> <p>1) A description of how VR was used in therapy (e.g. presence of a therapist) and how much VRET was administered</p> <p>2) A description of the hardware used, including: Visual output device, auditory output device, interaction device, and tracking</p> <p>3) A description of the software used, including: The virtual environments (or screenshots), interaction elements, customizability (during or before immersion), movement and any auxiliary software that the therapist used during exposure (e.g. casting a live view of the patient’s point of view to a monitor)</p> |
| Visual feedback - Resolution                | Resolution pr. eye.                                                                                                                                                                                                                                                                                                                                                                                                                                                                                                                                                                                                                                                                                                                                                                                                                                                                                                                                                                |

# Agoraphobia

[illegible]

## Social Anxiety Disorder

[illegible]

[illegible]

- Anderson, P. L., Price, M., Edwards, S. M., Obasaju, M. A., Schmertz, S. K., Zimand, E., & Calamaras, M. R. (2013). Virtual reality exposure therapy for social anxiety disorder: A randomized controlled trial. *Journal of Consulting and Clinical Psychology*, 81(5), 751–760. <https://doi.org/10.1037/a0033559>
- Anderson, P. L., Zimand, E., Hodges, L. F., & Rothbaum, B. O. (2005). Cognitive behavioral therapy for public-speaking anxiety using virtual reality for exposure. *Depression and Anxiety*, 22(3), 156–158. <https://doi.org/10.1002/da.20090>
- Arnfred, B. et al. (2022) ‘Group cognitive behavioural therapy with virtual reality exposure versus group cognitive behavioural therapy with in vivo exposure for social anxiety disorder and agoraphobia: A protocol for a randomised clinical trial’, *BMJ Open*, 12(2). doi: 10.1136/bmjopen-2021-051147.
- Botella, C., Garcia-Palacios, A., Villa, H., Banos, R. M., Quero, S., Alcaniz, M., & Riva, G. (2007). Virtual reality exposure in the treatment of panic disorder and agoraphobia: A controlled study. *CLINICAL PSYCHOLOGY & PSYCHOTHERAPY*, 14(3), 164–175. <https://doi.org/10.1002/cpp.524>
- Botella, C., Bretón-López, J., Serrano, B., García-Palacios, A., Quero, S., & Baños, R. (2014). Treatment of flying phobia using virtual reality exposure with or without cognitive restructuring: Participants’ preferences. *Revista de Psicopatología y Psicología Clínica*, 19(3), 157–169. <https://doi.org/10.5944/rppc.vol.19.num.3.2014.13898>
- Bouchard, S., Côté, S., St-Jacques, J., Robillard, G., & Renaud, P. (2006). Effectiveness of virtual reality exposure in the treatment of arachnophobia using 3D games. *Technol Health Care*, 14(1 PG-19–27), 19–27. NS -
- Bouchard, S., Dumoulin, S., Robillard, G., Guitard, T., Klinger, E., Forget, H., Loranger, C., & Roucaut, F. X. (2017). Virtual reality compared with in vivo exposure in the treatment of social anxiety disorder: a three-arm randomised controlled trial. *The British Journal of Psychiatry : The Journal of Mental Science*, 210(4), 276–283. <https://doi.org/10.1192/bjp.bp.116.184234>
- Breuer, T. A. (2017). Effects of values clarification intervention on treatment adherence and homework compliance during exposure therapy protocol for aviophobia [ProQuest Information & Learning]. In *Dissertation Abstracts International: Section B: The Sciences and Engineering* (Vol. 78, Issues 6-B(E)). <https://search.ebscohost.com/login.aspx?direct=true&db=psyh&AN=2017-16346-015&site=ehost-live>
- Bullinger, A. H., Angehrn, I., Wiederhold, B. K., Mueller-Spahn, F., & Mager, R. (2005). Treating acrophobia in a virtual environment. *Annual Review of CyberTherapy and Telemedicine*, 3, 93–100. <https://search.ebscohost.com/login.aspx?direct=true&db=psyh&AN=2008-04692-015&site=ehost-live>
- Cárdenas, G., Botella, C., Quero, S., Moreyra, L., De La rosa, A., & Muñoz, S. (2009). A cross-cultural validation of VR treatment system for flying phobia in the Mexican population.

*Annual Review of CyberTherapy and Telemedicine*, 7, 141–144.

<https://search.ebscohost.com/login.aspx?direct=true&db=psych&AN=2009-17266-034&site=ehost-live>

- Celik, Z., Alptekin, F. B., & Yavuz, K. F. (2020). Acrophobia treatment with virtual reality assisted acceptance and commitment therapy: case reports. *DUSUNEN ADAM-JOURNAL OF PSYCHIATRY AND NEUROLOGICAL SCIENCES*, 33(3), 317–324. <https://doi.org/10.14744/DAJPNS.2020.00097>
- Clemmensen, L., Bouchard, S., Rasmussen, J., Holmberg, T. T., Nielsen, J. H., Jepsen, J. R. M., & Lichtenstein, M. B. (2020). STUDY PROTOCOL: EXPOSURE IN VIRTUAL REALITY FOR SOCIAL ANXIETY DISORDER-a randomized controlled superiority trial comparing cognitive behavioral therapy with virtual reality based exposure to cognitive behavioral therapy with in vivo exposure. *BMC PSYCHIATRY*, 20(1). <https://doi.org/10.1186/s12888-020-2453-4>
- CM, C., JA, S., Silvério, J., & CF, S. (2006). Virtual reality and acrophobia: one-year follow-up and case study. *Cyberpsychol Behav*, 9(3 PG-336–41), 336–341. <https://doi.org/10.1089/cpb.2006.9.336>
- Côté, S., & Bouchard, S. (2005). Documenting the Efficacy of Virtual Reality Exposure with Psychophysiological and Information Processing Measures. *Applied Psychophysiology and Biofeedback*, 30(3), 217–232. <https://doi.org/http://dx.doi.org/10.1007/s10484-005-6379-x>
- de Quervain, D. J.-F., Bentz, D., Michael, T., Bolt, O. C., Wiederhold, B. K., Margraf, J., & Wilhelm, F. H. (2011). Glucocorticoids enhance extinction-based psychotherapy. *Proceedings of the National Academy of Sciences of the United States of America*, 108(16), 6621–6625. <https://doi.org/10.1073/pnas.1018214108>
- Farrell, L. J., Miyamoto, T., Donovan, C. L., Waters, A. M., Krisch, K. A., & Ollendick, T. H. (2021). Virtual Reality One-Session Treatment of Child-Specific Phobia of Dogs: A Controlled, Multiple Baseline Case Series. *Behavior Therapy*, 52(2), 478–491. <https://doi.org/10.1016/j.beth.2020.06.003>
- Geraets, C. N. W., Veling, W., Witlox, M., Staring, A. B. P., Matthijssen, S. J. M. A., & Cath, D. (2019). Virtual reality-based cognitive behavioural therapy for patients with generalized social anxiety disorder: a pilot study. *BEHAVIOURAL AND COGNITIVE PSYCHOTHERAPY*, 47(6), 745–750. <https://doi.org/10.1017/S1352465819000225>
- Gujjar, K. R., van Wijk, A., Kumar, R., & de Jongh, A. (2019). Efficacy of virtual reality exposure therapy for the treatment of dental phobia in adults: A randomized controlled trial. *JOURNAL OF ANXIETY DISORDERS*, 62, 100–108. <https://doi.org/10.1016/j.janxdis.2018.12.001>
- Gujjar, K. R., van Wijk, A., Sharma, R., & de Jongh, A. (2018). Virtual Reality Exposure Therapy for the Treatment of Dental Phobia: A Controlled Feasibility Study. *Behavioural and Cognitive Psychotherapy*, 46(3), 367–373. <https://doi.org/10.1017/S1352465817000534>

- Hartanto, D., Brinkman, W.-P., Kampmann, I. L., Morina, N., Emmelkamp, P. G. M., & Neerincx, M. A. (2016). Home-Based Virtual Reality Exposure Therapy with Virtual Health Agent Support. In Serino, S and Matic, A and Giakoumis, D and Lopez, G and Cipresso, P (Ed.), *PERVASIVE COMPUTING PARADIGMS FOR MENTAL HEALTH (MINDCARE 2015)* (Vol. 604, pp. 85–98). [https://doi.org/10.1007/978-3-319-32270-4\\_9](https://doi.org/10.1007/978-3-319-32270-4_9)
- Herbelin, B., Riquier, F., Grillon, H., & Thalmann, D. (2006). Virtual reality as a therapeutic tool in the confines of social anxiety disorder treatment. *International Journal on Disability and Human Development*, 5(3), 243–250. <https://doi.org/10.1515/IJDHD.2006.5.3.243>
- Hirsch, J. A. (2012). Virtual Reality Exposure Therapy and Hypnosis for Flying Phobia in a Treatment-Resistant Patient: A Case Report. *AMERICAN JOURNAL OF CLINICAL HYPNOSIS*, 55(2), 168–173. <https://doi.org/10.1080/00029157.2011.639587>
- HJ, K., Lee, S., Jung, D., JW, H., HJ, L., GJ, K., CY, C., Choi, S., SM, L., & CH, C. (2020). Effectiveness of a Participatory and Interactive Virtual Reality Intervention in Patients With Social Anxiety Disorder: Longitudinal Questionnaire Study. *J Med Internet Res*, 22(10 PG-e23024), e23024. <https://doi.org/10.2196/23024>
- HS, J., JH, L., HE, K., & JJ, K. (2021). Appropriate Number of Treatment Sessions in Virtual Reality-Based Individual Cognitive Behavioral Therapy for Social Anxiety Disorder. *J Clin Med*, 10(5 PG-). <https://doi.org/10.3390/jcm10050915>
- Hur, J. W. et al. (2021) ‘Virtual reality–based psychotherapy in social anxiety disorder: fMRI Study using a self-referential task’, *JMIR Mental Health*, 8(4). doi: 10.2196/25731.
- Jiang, M. Y. W., Upton, E., & Newby, J. M. (2020). A randomised wait-list controlled pilot trial of one-session virtual reality exposure therapy for blood-injection-injury phobias. *JOURNAL OF AFFECTIVE DISORDERS*, 276, 636–645. <https://doi.org/10.1016/j.jad.2020.07.076>
- Kampmann, I. L., Emmelkamp, P. M. G., Hartanto, D., Brinkman, W. P., Zijlstra, B. J. H., & Morina, N. (2016). Exposure to virtual social interactions in the treatment of social anxiety disorder: A randomized controlled trial. *Behaviour Research and Therapy*, 77, 147–156. <https://doi.org/10.1016/j.brat.2015.12.016>
- Kleim, B., Wilhelm, F. H., Temp, L., Margraf, J., Wiederhold, B. K., & Rasch, B. (2014). Sleep enhances exposure therapy. *Psychological Medicine*, 44(7), 1511–1519. <https://doi.org/10.1017/S0033291713001748>
- KR, G., Sharma, R., & AD, J. (2017). Virtual Reality Exposure Therapy for Treatment of Dental Phobia. *Dent Update*, 44(5 PG-423–4, 427–8, 431–2, 435), 423-424,427. <https://doi.org/10.12968/denu.2017.44.5.423>
- Krijn, M., Emmelkamp, P. M. G., Olafsson, R. P., Schuemie, M. J., & van der Mast, C. A. P. G. (2007). Do self-statements enhance the effectiveness of virtual reality exposure therapy? A comparative evaluation in acrophobia. *Cyberpsychology & Behavior : The Impact of the Internet, Multimedia and Virtual Reality on Behavior and Society*, 10(3), 362–370. <https://doi.org/10.1089/cpb.2006.9943>



- Krijn, M., Emmelkamp, P. M. G., Olafsson, R. P., Bouwman, M., van Gerwen, L. J., Spinhoven, P., Schuemie, M. J., & van der Mast, C. A. P. G. (2007). Fear of flying treatment methods: virtual reality exposure vs. cognitive behavioral therapy. *Aviation, Space, and Environmental Medicine*, 78(2), 121–128.
- Lee, H. et al. (2021) ‘The Effects of Virtual Reality Treatment on Prefrontal Cortex Activity in Patients With Social Anxiety Disorder: Participatory and Interactive Virtual Reality Treatment Study’, *Journal of Medical Internet Research*, 23(12), p. e31844. doi: 10.2196/31844.
- Levy, F., Leboucher, P., Rautureau, G., & Jouvent, R. (2016). E-virtual reality exposure therapy in acrophobia: A pilot study. *J Telemed Telecare*, 22(4 PG-215–20), 215–220.  
<https://doi.org/10.1177/1357633X15598243>
- Lindner, P., Dagoo, J., Hamilton, W., Miloff, A., Andersson, G., Schill, A., & Carlbring, P. (2021). Virtual Reality exposure therapy for public speaking anxiety in routine care: a single-subject effectiveness trial. *COGNITIVE BEHAVIOUR THERAPY*, 50(1), 67–87.  
<https://doi.org/10.1080/16506073.2020.1795240>
- Lindner, P., Miloff, A., Bergman, C., Andersson, G., Hamilton, W., & Carlbring, P. (2020). Gamified, Automated Virtual Reality Exposure Therapy for Fear of Spiders: A Single-Subject Trial Under Simulated Real-World Conditions. *Frontiers in Psychiatry*, 11(March), 1–9.  
<https://doi.org/10.3389/fpsy.2020.00116>
- Lindner, P., Miloff, A., Fagernas, S., Andersen, J., Sigeman, M., Andersson, G., Furmark, T., & Carlbring, P. (2019). Therapist-led and self-led one-session virtual reality exposure therapy for public speaking anxiety with consumer hardware and software: A randomized controlled trial. *JOURNAL OF ANXIETY DISORDERS*, 61, 45–54.  
<https://doi.org/10.1016/j.janxdis.2018.07.003>
- Lundin, J. et al. (2022) ‘Using 360-degree videos for virtual reality exposure in CBT for panic disorder with agoraphobia: A feasibility study’, *Behavioural and Cognitive Psychotherapy*, 50(2), pp. 158–170. doi: 10.1017/S1352465821000473.
- Malbos, E., Burgess, G. H., & Lancon, C. (2020). Virtual Reality and Fear of Shark Attack: A Case Study for the Treatment of Squalophobia. *CLINICAL CASE STUDIES*, 19(5), 339–354.  
<https://doi.org/10.1177/1534650120940014>
- Malbos, E., Rapee, R. M., & Kavakli, M. (2013). A controlled study of agoraphobia and the independent effect of virtual reality exposure therapy. *Australian and New Zealand Journal of Psychiatry*, 47(2), 160–168. <https://doi.org/10.1177/0004867412453626>
- Maples-Keller, J. L., Price, M., Jovanovic, T., Norrholm, S. D., Odenat, L., Post, L., Zwiebach, L., Breazeale, K., Gross, R., Kim, S. S.-J., Rothbaum, B. O., Maples-Keller, J. L., Price, M., Jovanovic, T., Norrholm, S. D., Odenat, L., Post, L., Zwiebach, L., Breazeale, K., ... Rothbaum, B. O. (2017). Targeting memory reconsolidation to prevent the return of fear in patients with fear of flying. *Depression and Anxiety*, 34(7), 610–620.  
<https://doi.org/10.1002/da.22626>



- Meindl, J. N., Saba, S., Gray, M., Stuebing, L., & Jarvis, A. (2019). Reducing blood draw phobia in an adult with autism spectrum disorder using low-cost virtual reality exposure therapy. *Journal of Applied Research in Intellectual Disabilities*, 32(6), 1446–1452. <https://doi.org/10.1111/jar.12637>
- Meyerbroeker, K., Morina, N., Kerkhof, G. A., & Emmelkamp, P. M. G. (2013). Virtual reality exposure therapy does not provide any additional value in agoraphobic patients: a randomized controlled trial. *Psychotherapy and Psychosomatics*, 82(3), 170–176. <https://doi.org/10.1159/000342715>
- Meyerbroeker, K., Powers, M. B., van Stegeren, A., & Emmelkamp, P. M. G. (2012). Does Yohimbine Hydrochloride Facilitate Fear Extinction in Virtual Reality Treatment of Fear of Flying? A Randomized Placebo-Controlled Trial. *PSYCHOTHERAPY AND PSYCHOSOMATICS*, 81(1), 29–37. <https://doi.org/10.1159/000329454>
- Meyerbröcker, K., Morina, N., & Emmelkamp, P. M. G. (2018). Enhancement of exposure therapy in participants with specific phobia: A randomized controlled trial comparing yohimbine, propranolol and placebo. *Journal of Anxiety Disorders*, 57, 48–56. <https://doi.org/10.1016/j.janxdis.2018.05.001>
- Meyerbröcker, K., Morina, N., Kerkhof, G., & Emmelkamp, P. M. G. (2011). Virtual reality exposure treatment of agoraphobia: a comparison of computer automatic virtual environment and head-mounted display. *Studies in Health Technology and Informatics*, 167(PG-51-56), 51–56. NS -
- Michaliszyn, D., Marchand, A., Bouchard, S., Martel, M.-O., & Poirier-Bisson, J. (2010). A Randomized, Controlled Clinical Trial of In Virtuo and In Vivo Exposure for Spider Phobia. *Cyberpsychology, Behavior, and Social Networking*, 13(6), 689–695. <https://doi.org/10.1089=cyber.2009.0277>
- Miloff, A., Lindner, P., Dafgard, P., Deak, S., Garke, M., Hamilton, W., Heinsoo, J., Kristoffersson, G., Rafi, J., Sindemark, K., Sjolund, J., Zenger, M., Reuterskiold, L., Andersson, G., & Carlbring, P. (2019). Automated virtual reality exposure therapy for spider phobia vs. in-vivo one-session treatment: A randomized non-inferiority trial. *BEHAVIOUR RESEARCH AND THERAPY*, 118, 130–140. <https://doi.org/10.1016/j.brat.2019.04.004>
- Moldovan, R., & David, D. (2014). One session treatment of cognitive and behavioral therapy and virtual reality for social and specific phobias. Preliminary results from a randomized clinical trial. *Journal of Cognitive and Behavioral Psychotherapies*, 14(1), 67–83.
- Nazligul, M. D., Murat Yilmaz, Gulec, U., Gozcu, M. A., O'Connor, R. V., Clarke, P. M., Spring, U. O., Nazligul, M. D., Yilmaz, M., Gulec, U., Gozcu, M. A., O'Connor, R. V., & Clarke, P. M. (2017). Overcoming Public Speaking Anxiety of Software Engineers Using Virtual Reality Exposure Therapy. *SYSTEMS, SOFTWARE AND SERVICES PROCESS IMPROVEMENT (EUROSPI 2017)*, 748(18), 191–202. <https://doi.org/10.1007/978-3-319-64218-5>
- Pelissolo, A., Zaoui, M., Aguayo, G., Yao, S. N., Roche, S., Ecochard, R., Gueyffier, F., Pull, C., Berthoz, A., Jouvent, R., & Cottraux, J. (2012). Virtual reality exposure therapy versus

cognitive behavior therapy for panic disorder with agoraphobia: A randomized comparison study. *Journal of Cybertherapy and Rehabilitation*, 5(1), 35–43.

- Pérez-Ara, M. A., Quero, S., Botella, C., Baños, R., Andreu-Mateu, S., García-Palacios, A., & Bretón-López, J. (2010). Virtual reality interoceptive exposure for the treatment of panic disorder and agoraphobia. *Studies in Health Technology and Informatics*, 154(PG-77-81), 77–81. <https://doi.org/10.3233/978-1-60750-561-7-77>
- Reitmaier, J. et al. (2022) ‘Effects of rhythmic eye movements during a virtual reality exposure paradigm for spider-phobic patients’, *Psychology and Psychotherapy: Theory, Research and Practice*, 95(1), pp. 57–78. doi: 10.1111/papt.12363.
- Rothbaum, B. O., Anderson, P., Zimand, E., Hodges, L., Lang, D., & Wilson, J. (2006). Virtual reality exposure therapy and standard (in vivo) exposure therapy in the treatment of fear of flying. *BEHAVIOR THERAPY*, 37(1), 80–90. <https://doi.org/10.1016/j.beth.2005.04.004>
- Rus-Calafell, M., Gutierrez-Maldonado, J., Botella, C., & Banos, R. M. (2013). Virtual reality exposure and imaginal exposure in the treatment of fear of flying: a pilot study. *Behavior Modification*, 37(4), 568–590. <https://doi.org/10.1177/0145445513482969>
- Schwarzmeier, H., Leehr, E. J., Böhnlein, J., Seeger, F. R., Roesmann, K., Gathmann, B., Herrmann, M. J., Siminski, N., Junghöfer, M., Straube, T., Grotgerd, D., & Dannlowski, U. (2020). Theranostic markers for personalized therapy of spider phobia: Methods of a bicentric external cross-validation machine learning approach. *International Journal of Methods in Psychiatric Research*, 29(2). <https://doi.org/10.1002/mpr.1812>
- Servera, M., Saez, B., & Mir, J. M. G. (2020). Feasibility of a virtual reality program to treat children with fear of darkness with nonexpert therapists. *REVISTA DE PSICOLOGIA CLINICA CON NINOS Y ADOLESCENTES*, 7(2), 16–21. <https://doi.org/10.21134/rpcna.2020.07.2.2>
- Shiban, Y., Brütting, J., Pauli, P., Mühlberger, A., Brütting, J., Pauli, P., & Mühlberger, A. (2015). Fear reactivation prior to exposure therapy: Does it facilitate the effects of VR exposure in a randomized clinical sample? *Journal of Behavior Therapy and Experimental Psychiatry*, 46, 133–140. <https://doi.org/10.1016/j.jbtep.2014.09.009>
- Shiban, Y., Diemer, J., Muller, J., Brütting-Schick, J., Pauli, P., & Mühlberger, A. (2017). Diaphragmatic breathing during virtual reality exposure therapy for aviophobia: functional coping strategy or avoidance behavior? a pilot study. *BMC Psychiatry*, 17. <https://doi.org/http://dx.doi.org/10.1186/s12888-016-1181-2>
- Shiban, Y., Schelhorn, I., Pauli, P., & Mühlberger, A. (2015). Effect of combined multiple contexts and multiple stimuli exposure in spider phobia: A randomized clinical trial in virtual reality. *Behaviour Research and Therapy*, 71, 45–53. <https://doi.org/10.1016/j.brat.2015.05.014>
- Shin, B. et al. (2021) ‘Effectiveness of self-guided virtual reality-based cognitive behavioral therapy for panic disorder: Randomized controlled trial’, *JMIR Mental Health*, 8(11), pp. 1–17. doi: 10.2196/30590.

- SL, W., RG, J., PJ, S., EF, O., Detweiler-Shostak, G., EL, B., & JM, F. (2005). Acrophobia and pathological height vertigo: indications for vestibular physical therapy? *Phys Ther*, 85(5 PG-443–58), 443–458. NS -
- St-Jacques, J., Bouchard, S., & Belanger, C. (2010). Is Virtual Reality Effective to Motivate and Raise Interest in Phobic Children Toward Therapy? A Clinical Trial Study of In Vivo With In Virtuo Versus In Vivo Only Treatment Exposure. *JOURNAL OF CLINICAL PSYCHIATRY*, 71(7), 924–931. <https://doi.org/10.4088/JCP.08m04822blu>
- Tart, C. D., Handelsman, P. R., DeBoer, L. B., Rosenfield, D., Pollack, M. H., Hofmann, S. G., Powers, M. B., Otto, M. W., & Smits, J. A. J. (2012). Augmentation of exposure therapy with post-session administration of d -cycloserine. *Journal of Psychiatric Research*, 47(2 PG-168–174), 168–174. <https://doi.org/10.1016/j.jpsychires.2012.09.024>
- Tortella-Feliu, M., Botella, C., Llabres, J., Maria Breton-Lopez, J., del Amo, A., Banos, R. M., & Gelabert, J. M. (2011). Virtual Reality Versus Computer-Aided Exposure Treatments for Fear of Flying. *BEHAVIOR MODIFICATION*, 35(1), 3–30. <https://doi.org/10.1177/0145445510390801>
- Trahan, M. H., Morley, R. H., Nason, E. E., Rodrigues, N., Huerta, L., & Metsis, V. (n.d.). Virtual Reality Exposure Simulation for Student Veteran Social Anxiety and PTSD: A Case Study. *CLINICAL SOCIAL WORK JOURNAL*. <https://doi.org/10.1007/s10615-020-00784-7>
- Wallach PhD, H. S., Safir PhD, M. P., Bar-Zvi MD, M., Wallach, H. S., Safir, M. P., & Bar-Zvi, M. (2011). Virtual Reality Exposure versus Cognitive Restructuring for Treatment of Public Speaking Anxiety: A Pilot Study. *The Israel Journal of Psychiatry and Related Sciences*, 48(2), 91–97. <https://search.proquest.com/docview/875884788?accountid=13607>
- Wallach, H. S., & Bar-Zvi, M. (2007). Virtual-reality-assisted treatment of flight phobia. *Israel Journal of Psychiatry and Related Sciences*, 44(1), 29–32.
- Wallach, H. S., Safir, M. P., & Bar-Zvi, M. (2009). Virtual reality cognitive behavior therapy for public speaking anxiety: a randomized clinical trial. *Behavior Modification*, 33(3), 314–338. <https://doi.org/10.1177/0145445509331926>
- YH, C., Vincelli, F., Riva, G., BK, W., JH, L., & KH, P. (2005). Effects of group experiential cognitive therapy for the treatment of panic disorder with agoraphobia. *Cyberpsychol Behav*, 8(4 PG-387–93), 387–393. <https://doi.org/10.1089/cpb.2005.8.387>
- Zainal, N. H. et al. (2021) ‘Pilot randomized trial of self-guided virtual reality exposure therapy for social anxiety disorder’, *Behaviour Research and Therapy*. Elsevier Ltd, 147(April), p. 103984. doi: 10.1016/j.brat.2021.103984.
